# Supplementary material for: Physical Activity Patterns in University Students: Do They Follow the Public Health Guidelines?
Source: PLoS One. 2016 Mar 29;11(3):e0152516. doi: 10.1371/journal.pone.0152516 (PMC4811432; doi:10.1371/journal.pone.0152516)
Supplement: S1 Dataset — First column: Day of the week; Second column: Weekdays or weekends; Third column: Gender; Fourth column: Number of steps; Fifth column: Minutes in sedentary mode; Sixth column: Minutes in light activity; Seventh column: Minutes in moderate activity; Eighth column: Minutes in vigorous activity. (XLSX) [file pone.0152516.s001.xlsx]

## Sheet: Sheet1
Day of the Week	Weekend	Gender	Steps	Sedentary min	Light min	Moderate min	Vigorous min
4	1	1	22514	730	445	115	48
5	1	1	13038	733	283	84	17
3	1	1	22514	730	445	115	48
1	1	1	13622	1011	334	95	0
2	1	1	16060	805	362	112	8
4	1	1	14151	734	360	84	6
5	1	1	13941	566	338	79	1
3	1	1	14151	734	360	84	6
1	1	1	11657	909	318	57	18
2	1	1	25253	681	370	195	21
4	1	1	21479	824	463	137	16
5	1	1	11141	681	390	54	2
3	1	1	21479	824	463	137	16
1	1	1	19439	613	444	123	1
2	1	1	17407	848	324	123	12
4	1	1	11615	702	284	88	10
5	1	1	4339	697	203	22	0
3	1	1	11615	702	284	88	10
1	1	1	10004	551	255	67	0
2	1	1	8479	607	209	47	2
4	1	1	12402	864	336	80	1
5	1	1	11018	731	376	33	19
3	1	1	12402	864	336	80	1
1	1	1	10509	1048	334	57	1
2	1	1	21249	741	308	179	6
4	1	1	17702	859	377	124	4
5	1	1	4142	1022	174	22	0
3	1	1	17702	859	377	124	4
1	1	1	12313	826	357	63	2
2	1	1	24156	791	373	193	5
4	1	1	10938	538	354	48	6
5	1	1	5326	782	280	26	0
3	1	1	10938	538	354	48	6
1	1	1	7153	575	321	40	3
2	1	1	5891	305	192	39	0
4	1	1	20200	593	460	109	27
5	1	1	10368	627	312	63	2
3	1	1	20200	593	460	109	27
1	1	1	8989	647	346	37	0
2	1	1	22414	471	422	161	12
4	1	1	23200	738	416	143	33
5	1	1	15058	547	272	79	30
3	1	1	23200	738	416	143	33
1	1	1	111478	689	324	66	8
2	1	1	20084	490	347	136	29
4	1	1	8027	748	310	45	0
5	1	1	15547	578	361	81	1
3	1	1	8027	748	310	45	0
1	1	1	2004	843	233	0	0
2	1	1	12002	751	365	66	0
4	1	1	13707	871	279	86	0
5	1	1	7789	771	170	47	1
3	1	1	13707	871	279	86	0
1	1	1	6407	836	157	38	4
2	1	1	27636	712	292	242	2
4	1	1	15459	929	403	100	8
5	1	1	6485	700	326	19	4
3	1	1	15459	929	403	100	8
1	1	1	12586	684	395	64	0
2	1	1	23110	488	449	162	11
4	1	1	12745	763	421	61	3
5	1	1	3975	731	208	15	0
3	1	1	12745	763	421	61	3
1	1	1	15046	922	437	78	3
2	1	1	22382	676	434	173	10
4	1	1	14684	898	424	56	0
5	1	1	11050	575	227	72	0
3	1	1	14684	898	424	56	0
1	1	1	13264	698	354	68	13
2	1	1	10933	753	327	60	6
4	1	1	20034	484	482	112	5
5	1	1	10790	739	324	44	0
3	1	1	20034	484	482	112	5
1	1	1	11414	263	245	30	26
2	1	1	21650	586	422	134	37
4	1	1	8762	708	524	50	1
5	1	1	4856	890	258	23	1
3	1	1	8762	708	524	50	1
1	1	1	18348	747	439	140	9
2	1	1	11622	573	487	90	3
4	1	1	10259	570	360	33	0
5	1	1	3617	653	198	6	0
3	1	1	10259	570	360	33	0
1	1	1	4480	722	172	16	0
2	1	1	12412	676	298	76	1
4	1	1	14064	609	288	133	4
5	1	1	12249	513	370	97	4
3	1	1	14064	609	288	133	4
1	1	1	14808	607	339	117	2
2	1	1	12024	633	256	103	10
4	1	1	11465	559	276	56	20
5	1	1	11307	756	264	51	23
3	1	1	11465	559	276	56	20
1	1	1	5691	779	286	30	2
2	1	1	7316	604	294	41	2
4	1	1	12078	778	294	83	7
5	1	1	13061	767	327	88	5
3	1	1	12078	778	294	83	7
1	1	1	11003	685	314	74	14
2	1	1	15729	696	344	94	17
4	1	1	8253	853	136	54	0
5	1	1	8277	698	210	38	3
3	1	1	8253	853	136	54	0
1	1	1	8240	612	194	43	0
2	1	1	6125	430	98	41	0
4	1	1	7149	835	195	42	3
5	1	1	12581	620	211	124	0
3	1	1	7149	835	195	42	3
1	1	1	13584	830	326	84	15
2	1	1	8548	870	250	44	4
4	1	1	5157	686	273	21	0
5	1	1	2585	822	230	4	0
3	1	1	5157	686	273	21	0
1	1	1	7167	825	335	28	2
2	1	1	5220	750	357	24	0
4	1	1	9041	725	176	43	29
5	1	1	9179	962	218	72	4
3	1	1	9041	725	176	43	29
1	1	1	11914	775	322	62	4
2	1	1	5717	370	177	22	0
4	1	1	16713	782	436	108	10
5	1	1	7734	903	431	27	0
3	1	1	16713	782	436	108	10
1	1	1	22032	632	418	172	12
2	1	1	12854	691	450	79	0
4	1	1	17908	971	270	136	3
5	1	1	17828	876	280	145	3
3	1	1	17908	971	270	136	3
1	1	1	16263	800	348	116	10
2	1	1	16560	830	366	118	1
4	1	1	7557	522	204	55	0
5	1	1	17197	667	365	53	0
3	1	1	7557	522	204	55	0
1	1	1	12493	872	308	89	6
2	1	1	10656	539	326	60	4
4	1	1	3374	1114	152	15	0
5	1	1	3755	1006	222	13	0
3	1	1	3374	1114	152	15	0
1	1	1	7260	864	247	37	5
2	1	1	10589	803	282	61	3
4	1	1	7469	870	367	34	0
5	1	1	4588	1005	218	24	0
3	1	1	7469	870	367	34	0
1	1	1	7874	819	381	45	3
2	1	1	10400	576	327	59	0
4	1	1	14134	912	340	78	24
5	1	1	12191	827	264	84	12
3	1	1	14134	912	340	78	24
1	1	1	10675	563	241	49	19
2	1	1	4031	803	226	22	1
4	1	1	4014	896	176	22	0
5	1	1	9317	636	309	55	1
3	1	1	4014	896	176	22	0
1	1	1	3933	630	241	15	0
2	1	1	4367	641	217	20	5
4	1	1	15385	913	285	109	10
5	1	1	11452	631	233	87	4
3	1	1	15385	913	285	109	10
1	1	1	8464	906	321	52	5
2	1	1	8297	702	242	46	0
4	1	1	14762	599	276	88	27
5	1	1	9197	593	306	57	5
3	1	1	14762	599	276	88	27
1	1	1	3798	815	261	10	0
2	1	1	9732	379	330	46	0
3	1	1	6463	1011	271	28	0
4	1	1	4592	718	231	14	0
5	1	1	11915	582	490	23	0
1	1	1	11365	445	392	52	2
2	1	1	12437	705	332	76	0
4	1	1	3188	590	192	17	0
5	1	1	5605	786	340	34	1
3	1	1	3188	590	192	17	0
1	1	1	6506	802	356	24	0
2	1	1	9128	737	432	43	0
4	1	1	7772	493	229	58	0
5	1	1	18672	1026	233	165	16
3	1	1	7772	493	229	58	0
1	1	1	9829	852	157	85	15
2	1	1	19439	805	270	158	21
4	1	1	14080	891	393	79	12
5	1	1	15957	784	469	92	22
3	1	1	14080	891	393	79	12
1	1	1	15985	826	488	105	19
2	1	1	15089	735	485	95	17
4	1	1	13345	821	414	99	2
5	1	1	9911	838	458	58	0
3	1	1	13345	821	414	99	2
1	1	1	5168	1021	301	31	0
2	1	1	6724	789	321	47	0
4	1	1	8346	468	199	42	3
5	1	1	2958	303	114	17	0
3	1	1	8346	468	199	42	3
1	1	1	8286	409	240	40	3
2	1	1	8259	567	205	47	5
4	1	1	3824	848	168	22	0
5	1	1	12512	656	458	60	2
3	1	1	3824	848	168	22	0
1	1	1	3477	1031	225	17	0
2	1	1	6813	672	220	40	0
4	1	1	4040	1149	280	11	0
5	1	1	4426	1142	193	21	0
3	1	1	4040	1149	280	11	0
1	1	1	3877	1093	124	23	0
2	1	1	6186	974	224	30	1
4	1	1	19277	572	527	126	1
5	1	1	20125	667	427	122	0
3	1	1	19277	572	527	126	1
1	1	1	13450	634	390	90	0
2	1	1	16647	407	333	122	1
4	1	1	7067	869	234	33	15
5	1	1	2449	1138	148	12	0
3	1	1	7067	869	234	33	15
1	1	1	6035	836	255	52	0
2	1	1	5707	1041	224	39	5
3	1	1	7701	802	286	30	1
4	1	1	14110	463	434	61	2
5	1	1	14422	679	534	68	0
1	1	1	22590	506	291	184	8
2	1	1	15051	657	322	102	12
4	1	1	11908	517	228	81	12
5	1	1	2092	904	214	2	0
3	1	1	11899	835	376	74	9
1	1	1	5652	734	202	5	15
2	1	1	11899	835	376	74	9
2	1	1	6971	625	248	41	0
3	1	1	20183	565	354	106	31
1	1	1	6971	625	248	41	0
4	1	1	11386	747	289	59	5
5	1	1	12158	724	415	54	1
2	1	1	7951	493	216	56	0
3	1	1	6767	569	154	36	1
4	1	1	4552	515	180	29	0
1	1	1	1998	740	165	9	0
5	1	1	1998	740	165	9	0
2	1	1	4735	918	164	27	0
3	1	1	7458	765	323	28	0
4	1	1	3124	1041	181	10	0
1	1	1	4735	918	164	27	0
5	1	1	5910	1134	283	23	0
2	1	1	9813	860	303	55	0
3	1	1	10734	514	469	53	2
4	1	1	14870	459	368	86	0
1	1	1	13334	449	426	56	0
5	1	1	13334	449	426	56	0
2	1	1	6470	781	255	29	0
3	1	1	12706	939	267	75	10
4	1	1	1715	942	155	3	0
1	1	1	6470	781	255	29	0
5	1	1	1992	936	151	1	0
2	1	1	5149	819	193	19	0
3	1	1	6482	804	212	17	0
4	1	1	1588	783	121	1	0
1	1	1	3053	538	202	6	0
5	1	1	3053	538	202	6	0
2	1	1	11201	585	226	73	0
3	1	1	8322	816	222	53	0
4	1	1	8727	575	179	61	0
1	1	1	11201	585	226	73	0
5	1	1	7496	480	194	51	0
2	1	1	10534	345	227	62	3
3	1	1	22865	416	212	109	22
4	1	1	10731	412	248	59	1
1	1	1	10534	345	227	62	3
5	1	1	10173	208	277	41	8
6	2	1	2348	718	143	10	0
7	2	1	8897	735	317	43	10
6	2	1	3449	785	224	11	0
7	2	1	9605	807	247	53	9
6	2	1	16422	916	414	102	7
7	2	1	3836	931	265	17	0
6	2	1	4053	868	249	12	0
7	2	1	6335	862	245	25	0
6	2	1	6358	885	356	7	0
7	2	1	4289	865	270	6	0
6	2	1	14011	1072	261	91	16
7	2	1	4523	1028	286	7	0
6	2	1	3320	838	194	7	0
7	2	1	3452	691	146	16	0
6	2	1	3911	1059	274	4	0
7	2	1	12488	837	371	53	6
6	2	1	3393	697	277	14	0
7	2	1	5387	665	256	20	0
6	2	1	4927	826	241	15	0
7	2	1	2919	894	245	8	0
6	2	1	1818	962	155	1	0
7	2	1	2863	681	167	5	0
6	2	1	6657	691	321	15	2
7	2	1	10185	631	383	44	3
6	2	1	6707	1150	264	26	0
7	2	1	6466	806	281	22	0
6	2	1	1601	748	110	0	0
7	2	1	3405	753	140	11	0
6	2	1	10279	651	438	80	0
7	2	1	8607	902	356	24	0
6	2	1	8750	852	374	32	2
7	2	1	2382	980	174	11	0
6	2	1	4262	808	226	14	0
7	2	1	1926	848	156	4	0
6	2	1	9764	936	270	56	12
7	2	1	10697	729	353	99	2
6	2	1	2965	962	216	5	0
7	2	1	5530	638	295	23	1
6	2	1	9357	586	295	42	22
7	2	1	4208	936	186	23	0
6	2	1	3843	516	182	12	0
7	2	1	4972	577	204	21	1
6	2	1	7505	894	270	42	4
7	2	1	6232	834	164	36	7
6	2	1	5819	941	208	20	1
7	2	1	5513	777	272	16	1
6	2	1	7866	889	217	40	20
7	2	1	4352	635	260	14	0
6	2	1	9759	512	610	27	0
7	2	1	11674	459	692	22	0
6	2	1	8055	1035	374	15	16
7	2	1	5053	1054	302	19	0
6	2	1	5858	704	269	27	0
7	2	1	6310	618	342	23	0
6	2	1	4163	941	199	14	0
7	2	1	1609	901	135	6	0
6	2	1	3766	831	252	9	0
7	2	1	4121	1023	237	17	1
6	2	1	7910	1004	320	36	9
7	2	1	5241	611	226	18	0
6	2	1	4254	644	228	19	0
7	2	1	4362	832	202	14	0
6	2	1	2834	942	244	2	0
7	2	1	8024	539	226	35	0
6	2	1	6673	857	455	10	0
7	2	1	5104	432	213	29	2
6	2	1	16223	564	704	20	0
7	2	1	15182	517	661	43	0
6	2	1	994	266	104	3	0
7	2	1	10716	609	503	12	0
6	2	1	11158	990	274	69	11
7	2	1	6415	1044	310	25	0
6	2	1	4026	1108	313	19	0
7	2	1	6350	948	472	20	0
6	2	1	9199	690	456	48	0
7	2	1	6013	1002	349	27	0
6	2	1	4417	695	206	15	0
7	2	1	1753	449	98	5	0
6	2	1	11057	567	599	15	0
7	2	1	9810	604	577	5	0
6	2	1	3974	1165	274	1	0
7	2	1	5240	1000	298	10	0
6	2	1	23079	605	500	133	3
7	2	1	24475	451	554	129	0
6	2	1	4668	951	259	27	0
7	2	1	12240	913	289	95	0
6	2	1	7034	617	379	14	0
7	2	1	13949	705	329	108	4
6	2	1	2719	1047	247	0	0
7	2	1	14197	882	427	108	7
6	2	1	14437	680	406	59	21
7	2	1	9571	879	433	33	0
6	2	1	3580	1021	225	23	0
7	2	1	5948	710	237	30	0
6	2	1	6271	992	290	19	0
7	2	1	13168	821	314	91	7
6	2	1	12257	455	452	36	6
7	2	1	7249	50	302	4	0
6	2	1	3723	785	198	7	0
7	2	1	3335	698	146	18	0
6	2	1	1683	972	100	3	0
7	2	1	1893	896	123	5	0
6	2	1	7257	850	306	8	0
7	2	1	7151	809	288	20	0
6	2	1	7692	217	204	3	9
7	2	1	236	89	22	0	0
4	1	2	11077	676	371	61	0
5	1	2	13732	864	264	79	6
3	1	2	11077	676	371	61	0
1	1	2	12757	694	336	70	6
2	1	2	15404	739	355	95	0
4	1	2	23859	408	452	171	3
5	1	2	14629	612	431	108	9
3	1	2	23859	408	452	171	3
1	1	2	16959	580	415	107	15
2	1	2	15021	525	461	93	17
4	1	2	10492	832	333	53	0
5	1	2	14250	1049	301	82	4
3	1	2	10492	832	333	53	0
1	1	2	15009	1011	362	67	0
2	1	2	15251	978	387	75	0
4	1	2	17070	523	370	123	5
5	1	2	3272	810	252	4	0
3	1	2	17070	523	370	123	5
1	1	2	8522	863	319	51	0
2	1	2	18827	815	381	149	0
4	1	2	3510	896	193	4	0
5	1	2	12142	681	287	63	10
3	1	2	3510	896	193	4	0
1	1	2	2646	412	136	4	0
2	1	2	8315	560	260	32	0
4	1	2	5308	790	398	9	0
5	1	2	4367	872	286	13	0
3	1	2	5308	790	398	9	0
1	1	2	5494	925	249	11	0
2	1	2	6347	736	429	10	0
4	1	2	6672	667	346	14	0
5	1	2	7920	612	332	36	0
3	1	2	6672	667	346	14	0
1	1	2	9771	795	247	60	5
2	1	2	7861	808	318	23	0
4	1	2	12709	1007	254	91	0
5	1	2	7200	979	217	44	0
3	1	2	12709	1007	254	91	0
1	1	2	6702	1121	291	28	0
2	1	2	12389	955	239	71	4
4	1	2	9224	970	360	50	0
5	1	2	6037	762	228	21	0
3	1	2	9224	970	360	50	0
1	1	2	15635	509	320	78	15
2	1	2	11169	952	333	58	5
4	1	2	16099	878	265	141	8
5	1	2	14355	657	221	111	0
3	1	2	16099	878	265	141	8
1	1	2	10020	667	233	60	15
2	1	2	10521	759	295	60	10
4	1	2	5846	745	303	35	7
5	1	2	5184	706	284	24	2
3	1	2	5846	745	303	35	7
1	1	2	7170	746	317	25	8
2	1	2	7063	765	313	35	0
4	1	2	7944	685	260	33	15
5	1	2	8364	804	303	30	0
3	1	2	10375	868	312	60	7
1	1	2	10403	741	330	60	13
2	1	2	10375	868	312	60	7
3	1	2	6403	692	308	26	0
4	1	2	5929	731	198	32	0
5	1	2	7445	715	430	60	0
1	1	2	13754	789	287	96	13
2	1	2	10100	827	286	83	14
4	1	2	17314	460	305	133	4
5	1	2	11653	670	376	39	3
3	1	2	13542	691	258	98	15
1	1	2	17200	628	288	124	6
2	1	2	13542	691	258	98	15
4	1	2	7642	951	298	35	0
5	1	2	5010	669	320	16	0
3	1	2	9524	872	308	41	0
1	1	2	7249	881	231	23	0
2	1	2	9524	872	308	41	0
5	1	2	11544	805	198	80	2
4	1	2	3506	616	149	13	0
1	1	2	2594	777	147	8	0
2	1	2	7093	824	203	43	0
3	1	2	3506	616	149	13	0
5	1	2	8241	992	207	44	0
4	1	2	8855	731	300	37	0
1	1	2	8336	762	224	38	0
2	1	2	8855	731	300	37	0
3	1	2	8076	782	221	36	0
5	1	2	18112	588	516	83	13
4	1	2	15410	706	335	106	4
1	1	2	10434	749	196	76	4
2	1	2	15410	706	335	106	4
3	1	2	12838	738	367	84	4
5	1	2	5527	985	296	29	0
4	1	2	3434	668	224	5	0
1	1	2	10400	705	279	51	0
2	1	2	5339	885	298	15	0
3	1	2	3434	668	224	5	0
5	1	2	11010	810	237	57	10
4	1	2	7575	968	228	38	0
1	1	2	11843	706	226	68	10
2	1	2	11605	804	242	49	16
3	1	2	7575	968	228	38	0
5	1	2	6434	920	298	24	0
4	1	2	7573	1035	264	43	0
1	1	2	10082	963	297	56	0
2	1	2	7573	1035	264	43	0
3	1	2	7993	1002	232	40	0
5	1	2	6671	837	244	28	0
4	1	2	5990	1078	197	29	0
1	1	2	4716	999	205	22	0
2	1	2	9106	980	220	54	0
3	1	2	5990	1078	197	29	0
5	1	2	4272	926	305	8	0
4	1	2	8092	797	432	47	0
1	1	2	5656	986	177	35	0
2	1	2	5386	911	367	20	0
3	1	2	8092	797	432	47	0
5	1	2	12810	634	376	76	1
4	1	2	7212	799	298	35	5
1	1	2	6600	761	217	35	0
2	1	2	7212	799	298	35	5
3	1	2	9012	724	229	52	5
5	1	2	6799	823	404	16	0
4	1	2	5552	1078	272	28	1
1	1	2	7050	649	335	30	0
2	1	2	5552	1078	272	28	1
3	1	2	6263	998	315	32	0
5	1	2	11596	874	394	77	0
4	1	2	6323	773	195	37	0
1	1	2	9061	706	266	57	0
2	1	2	7855	692	240	53	1
3	1	2	6323	773	195	37	0
5	1	2	7736	593	356	65	0
4	1	2	8553	739	272	53	0
1	1	2	10077	571	388	59	0
2	1	2	8553	739	272	53	0
3	1	2	7205	854	332	44	0
5	1	2	9308	977	186	55	0
4	1	2	4432	1006	178	21	0
1	1	2	11181	735	254	80	0.09
2	1	2	8536	927	217	52	0
3	1	2	4432	1006	178	21	0
5	1	2	3052	1096	166	12	0
4	1	2	5250	735	178	23	0
1	1	2	7607	944	246	32	0
2	1	2	5250	735	178	23	0
3	1	2	8592	770	203	53	0
5	1	2	17933	820	286	132	0
4	1	2	11048	804	184	61	0
1	1	2	12376	801	246	78	1
2	1	2	14052	878	189	95	0
3	1	2	11048	804	184	61	0
5	1	2	7970	792	413	34	0
4	1	2	4754	669	340	16	0
1	1	2	7542	660	419	82	0
2	1	2	4754	669	340	16	0
3	1	2	6043	891	377	28	0
5	1	2	12289	626	325	79	7
4	1	2	14531	623	272	110	8
1	1	2	8730	851	280	28	0
2	1	2	14531	623	272	110	8
3	1	2	5305	804	190	17	0
5	1	2	5280	887	325	14	0
4	1	2	4726	673	131	25	0
1	1	2	9462	800	430	29	0
2	1	2	7971	693	267	32	0
3	1	2	4726	673	131	25	0
5	1	2	13606	703	455	70	2
4	1	2	8218	794	276	40	0
1	1	2	8383	637	326	42	0
2	1	2	8218	794	276	40	0
3	1	2	12713	769	463	62	2
5	1	2	6950	589	306	33	0
4	1	2	21682	581	278	160	11
1	1	2	8577	816	314	53	1
2	1	2	12675	716	351	74	1
3	1	2	21682	581	278	160	11
5	1	2	12102	665	425	51	0
4	1	2	7144	958	264	24	1
1	1	2	13292	1103	267	70	0
2	1	2	7144	958	264	24	1
3	1	2	12319	835	374	65	0
5	1	2	4359	587	215	19	0
4	1	2	17776	589	217	140	5
1	1	2	5419	659	210	30	1
2	1	2	5947	523	194	30	0
3	1	2	17776	589	217	140	5
5	1	2	3156	610	294	2	0
1	1	2	5951	714	316	31	2
4	1	2	5853	795	245	33	0
2	1	2	5853	795	245	33	0
3	1	2	7929	828	275	46	2
5	1	2	3126	955	247	6	0
4	1	2	5117	660	379	14	0
1	1	2	4329	1025	162	17	0
2	1	2	6702	864	361	24	0
3	1	2	5117	660	379	14	0
5	1	2	14714	825	357	64	0
4	1	2	11996	517	299	62	0
1	1	2	12389	616	297	56	0
2	1	2	11996	517	299	62	0
3	1	2	10537	718	240	47	1
5	1	2	7364	844	319	48	0
4	1	2	6467	547	219	31	1
1	1	2	5549	609	352	21	0
2	1	2	6467	547	219	31	1
3	1	2	5825	800	281	26	0
5	1	2	5849	925	331	19	0
4	1	2	12943	943	367	65	2
1	1	2	7745	842	422	25	0
2	1	2	9907	681	195	44	0
3	1	2	12943	943	367	65	2
5	1	2	2194	1045	254	1	0
4	1	2	9047	785	381	42	0
1	1	2	8864	878	285	47	2
2	1	2	9047	785	381	42	0
3	1	2	6860	798	218	36	0
5	1	2	11825	664	382	52	0
4	1	2	10826	970	344	65	0
1	1	2	6522	990	298	39	2
2	1	2	11485	784	204	81	0
3	1	2	10826	970	344	65	0
5	1	2	10860	734	291	65	9
4	1	2	10866	672	204	75	0
1	1	2	6547	816	297	29	1
2	1	2	10866	672	204	75	0
3	1	2	10582	707	310	57	0
5	1	2	6540	547	313	29	0
4	1	2	6929	838	277	31	1
1	1	2	6125	893	224	29	0
2	1	2	3974	682	203	18	0
3	1	2	6929	838	277	31	1
5	1	2	2708	998	191	6	0
4	1	2	6728	773	210	28	0
1	1	2	5242	798	172	227	0
2	1	2	6728	773	210	28	0
3	1	2	258	238	24	0	0
5	1	2	11309	675	201	84	0
4	1	2	5565	713	123	41	0
1	1	2	8242	629	255	44	0
2	1	2	8118	736	166	55	0
3	1	2	5565	713	123	41	0
5	1	2	5846	847	302	10	0
4	1	2	11240	835	238	75	0
1	1	2	4929	878	185	29	0
2	1	2	11240	835	238	75	0
3	1	2	11674	850	262	85	0
5	1	2	5789	575	232	20	6
4	1	2	5860	937	152	35	8
1	1	2	6921	842	138	46	6
2	1	2	4737	944	187	25	0
3	1	2	5860	937	152	35	8
5	1	2	5503	716	424	8	0
4	1	2	6926	822	378	29	0
1	1	2	10793	944	336	60	0
2	1	2	4625	978	280	14	0
3	1	2	6926	822	378	29	0
5	1	2	14239	904	339	93	0
4	1	2	15808	762	361	76	0
1	1	2	7443	817	215	46	0
2	1	2	5614	758	222	22	0
3	1	2	15808	762	361	76	0
5	1	2	11006	676	386	44	4
4	1	2	8024	797	253	46	0
1	1	2	10219	824	281	63	4
2	1	2	8176	797	258	55	2
3	1	2	8024	797	253	46	0
5	1	2	2475	682	227	0	0
4	1	2	4077	1062	217	13	0
1	1	2	10397	769	306	51	0
2	1	2	4077	1062	217	13	0
3	1	2	9441	687	436	64	0
5	1	2	4457	413	269	23	0
4	1	2	9442	699	284	45	0
1	1	2	5523	680	290	28	0
2	1	2	5470	802	242	24	1
3	1	2	9442	699	284	45	0
2	1	2	11468	719	313	78	3
3	1	2	9141	508	224	58	3
4	1	2	9357	657	255	53	4
1	1	2	7173	708	223	25	5
5	1	2	7173	708	223	25	5
2	1	2	9751	839	294	46	0
3	1	2	9463	932	236	56	3
4	1	2	12574	851	375	62	0
1	1	2	9751	839	294	46	0
5	1	2	6756	845	199	35	0
2	1	2	13526	970	292	91	2
3	1	2	15898	827	373	78	1
4	1	2	9885	498	238	63	0
1	1	2	8901	861	333	27	0
5	1	2	7086	745	200	40	0
2	1	2	10597	847	320	55	0
3	1	2	14608	788	308	90	0
4	1	2	11810	1004	276	66	0
1	1	2	17063	821	442	92	0
5	1	2	17063	821	442	92	0
2	1	2	10855	552	219	80	0
3	1	2	9879	557	258	67	2
1	1	2	10855	552	219	80	0
4	1	2	6821	485	271	33	0
5	1	2	8295	689	182	54	0
2	1	2	18152	426	454	120	0
3	1	2	18497	647	318	130	3
4	1	2	12917	646	399	76	0
1	1	2	21112	731	235	154	0
5	1	2	21112	731	235	154	0
2	1	2	7747	769	170	44	1
3	1	2	15253	480	204	92	12
4	1	2	9085	582	205	49	2
1	1	2	7747	769	170	44	1
5	1	2	9509	680	207	48	7
2	1	2	9652	848	181	66	8
3	1	2	9203	396	218	62	0
4	1	2	7990	853	231	47	0
1	1	2	4838	767	201	26	3
5	1	2	4838	767	201	26	3
2	1	2	12452	725	347	90	2
3	1	2	9233	618	327	67	1
4	1	2	12612	720	348	74	4
1	1	2	12452	725	347	90	2
5	1	2	9807	804	316	63	1
2	1	2	5209	1018	416	6	0
3	1	2	6544	981	311	14	0
4	1	2	5103	806	233	19	0
1	1	2	5209	1018	416	6	0
5	1	2	4293	665	449	6	0
2	1	2	9836	813	183	62	0
3	1	2	4066	852	192	18	1
4	1	2	13530	676	239	89	1
1	1	2	7585	807	217	40	0
5	1	2	7585	807	217	40	0
2	1	2	7056	693	330	28	0
3	1	2	6540	1026	321	23	0
4	1	2	6593	806	296	29	0
1	1	2	7056	693	330	28	0
5	1	2	6077	800	245	29	0
2	1	2	5153	796	263	22	0
3	1	2	9906	833	302	64	3
1	1	2	13559	853	245	91	0
4	1	2	6757	888	285	40	0
5	1	2	13559	853	245	91	0
2	1	2	6790	742	239	35	0
3	1	2	6473	676	282	28	0
4	1	2	3936	828	214	17	0
1	1	2	6790	742	239	35	0
5	1	2	6444	600	343	15	0
2	1	2	12466	493	156	92	1
3	1	2	8575	389	173	55	2
4	1	2	9847	773	277	49	0
1	1	2	11691	793	325	63	0
5	1	2	11691	793	325	63	0
2	1	2	11550	459	277	73	0
3	1	2	13358	536	353	84	1
4	1	2	10369	643	271	77	0
1	1	2	11550	459	277	73	0
5	1	2	9721	670	277	77	0
2	1	2	5559	754	239	25	3
3	1	2	7864	608	235	50	0
4	1	2	5567	569	149	35	1
1	1	2	7352	520	207	39	2
5	1	2	7352	520	207	39	2
2	1	2	10587	908	247	71	1
3	1	2	8288	561	259	47	0
4	1	2	7539	867	232	46	0
1	1	2	10587	908	247	71	1
5	1	2	5975	766	242	25	0
6	2	2	7736	809	299	25	0
7	2	2	5287	755	250	12	0
6	2	2	20197	435	408	73	28
7	2	2	8768	866	321	44	5
6	2	2	4040	981	221	9	0
7	2	2	3663	887	238	10	0
6	2	2	6181	942	296	25	0
7	2	2	2553	745	164	11	3
6	2	2	12332	793	293	61	24
7	2	2	9412	460	240	38	17
6	2	2	5944	910	355	21	0
7	2	2	5864	834	327	5	0
6	2	2	5383	673	388	16	0
7	2	2	3092	869	298	4	0
6	2	2	4186	992	223	13	0
7	2	2	2304	1113	233	4	0
6	2	2	6570	1028	321	12	0
7	2	2	7325	768	339	19	0
6	2	2	7313	894	208	39	0
7	2	2	4563	875	192	25	0
6	2	2	7788	726	231	16	29
7	2	2	2967	873	229	0	0
6	2	2	5569	756	218	32	0
7	2	2	5756	725	285	18	0
6	2	2	9934	657	453	51	0
7	2	2	8563	815	427	34	2
6	2	2	5754	706	206	21	0
7	2	2	13070	507	306	75	5
6	2	2	10218	771	295	56	0
7	2	2	6091	974	434	11	0
6	2	2	6444	941	198	37	0
7	2	2	3733	1138	234	7	0
6	2	2	3185	708	188	6	0
7	2	2	4983	775	196	19	0
6	2	2	8575	789	557	24	0
7	2	2	7536	910	437	21	0
6	2	2	5490	697	312	15	0
7	2	2	11528	804	442	38	0
6	2	2	2479	481	189	3	0
7	2	2	1907	774	169	2	0
6	2	2	4759	1057	310	13	0
7	2	2	4970	1029	337	7	0
6	2	2	6359	841	363	6	0
7	2	2	5424	1106	333	1	0
6	2	2	4104	619	292	15	0
7	2	2	4307	984	294	14	0
6	2	2	14593	520	307	90	4
7	2	2	5406	478	285	10	0
6	2	2	10524	491	482	69	0
7	2	2	11495	658	418	70	0
6	2	2	3986	899	301	12	0
7	2	2	12954	767	525	74	0
6	2	2	9308	604	215	30	0
7	2	2	4795	555	290	66	1
6	2	2	4919	811	315	3	0
7	2	2	5287	798	302	10	0
6	2	2	2450	690	183	1	0
7	2	2	1987	944	178	6	0
6	2	2	9174	867	347	32	0
7	2	2	13992	941	301	83	0
6	2	2	7452	811	497	48	0
7	2	2	11690	728	469	88	0
6	2	2	7511	716	390	11	0
7	2	2	5734	593	320	12	0
6	2	2	3998	921	218	11	0
7	2	2	6142	869	247	20	0
6	2	2	16547	595	303	109	0
7	2	2	13742	821	402	78	2
6	2	2	7162	755	350	28	1
7	2	2	6720	595	341	7	0
6	2	2	6075	936	354	15	0
7	2	2	5391	1059	303	7	0
6	2	2	7293	758	333	35	0
7	2	2	16150	447	319	106	11
6	2	2	2641	892	256	3	0
7	2	2	7553	747	309	31	0
6	2	2	7153	797	448	12	0
7	2	2	6893	873	339	22	0
6	2	2	15318	755	298	70	0
7	2	2	14989	929	253	76	0
6	2	2	9168	671	347	28	0
7	2	2	5364	623	341	9	0
6	2	2	7676	919	474	47	0
7	2	2	7473	690	404	24	0
6	2	2	10307	735	518	38	9
7	2	2	7655	879	452	25	0
6	2	2	11862	746	381	56	0
7	2	2	9773	517	468	22	0
6	2	2	6937	651	319	27	2
7	2	2	7287	690	267	27	1
6	2	2	5171	765	355	4	0
7	2	2	5124	866	235	19	1
6	2	2	5473	1068	197	31	0
7	2	2	1781	916	202	1	0
6	2	2	3867	729	202	11	0
7	2	2	5522	425	186	29	0
6	2	2	4604	953	320	3	0
7	2	2	4235	898	280	7	0
6	2	2	6309	916	274	23	4
7	2	2	3588	732	193	11	0
6	2	2	4994	863	396	3	0
7	2	2	4850	883	360	4	0
6	2	2	2504	837	191	0	0
7	2	2	7968	867	318	28	2
6	2	2	9072	624	458	25	0
7	2	2	6819	597	370	11	0
6	2	2	5333	532	366	9	0
7	2	2	4747	1026	241	12	0
6	2	2	6467	477	367	51	0
7	2	2	5215	582	331	41	0
6	2	2	4225	617	219	4	0
7	2	2	2950	681	147	4	0
6	2	2	5437	919	274	16	1
7	2	2	8735	943	317	32	1
6	2	2	8901	861	333	27	0
7	2	2	13618	502	485	39	0
6	2	2	7476	472	461	12	0
7	2	2	6391	897	319	19	0
6	2	2	2116	460	174	0	0
7	2	2	2554	572	165	5	0
6	2	2	4275	589	232	16	0
7	2	2	7751	680	259	33	0
6	2	2	4429	464	233	9	0
7	2	2	2246	636	148	2	0
6	2	2	3543	638	156	9	0
7	2	2	3241	665	242	3	0
6	2	2	2152	885	262	8	0
7	2	2	5085	869	368	41	0
6	2	2	3410	827	256	2	0
7	2	2	2927	964	326	1	0
6	2	2	5957	650	329	19	1
7	2	2	5247	874	222	13	0
6	2	2	7884	773	478	14	0
7	2	2	3066	1060	292	2	0
6	2	2	1034	146	117	1	0
7	2	2	5948	544	312	18	0
6	2	2	3485	832	232	5	0
7	2	2	4314	765	294	5	0
6	2	2	3903	550	183	11	0
7	2	2	2724	718	167	7	0
6	2	2	9772	715	341	49	0
7	2	2	7909	928	288	28	0
6	2	2	4587	797	229	6	0
7	2	2	2650	700	166	6	0
6	2	2	1701	737	135	2	0
7	2	2	5256	697	233	14	0
